# Supplementary material
Source: MDPI journal article supplement (https://www.mdpi.com/2072-4292/10/8/1314)
Supplement: s1 [file s1 › remotesensing-330253-SI.pdf]

# Use of SMOS L3 Soil Moisture Data: Validation and Drought Assessment for Pernambuco State, Northeast Brazil

Alzira G. S. S. Souza, Alfredo Ribeiro Neto, Luciana Rossato, Regina C. S. Alvalá and Laio L. Souza

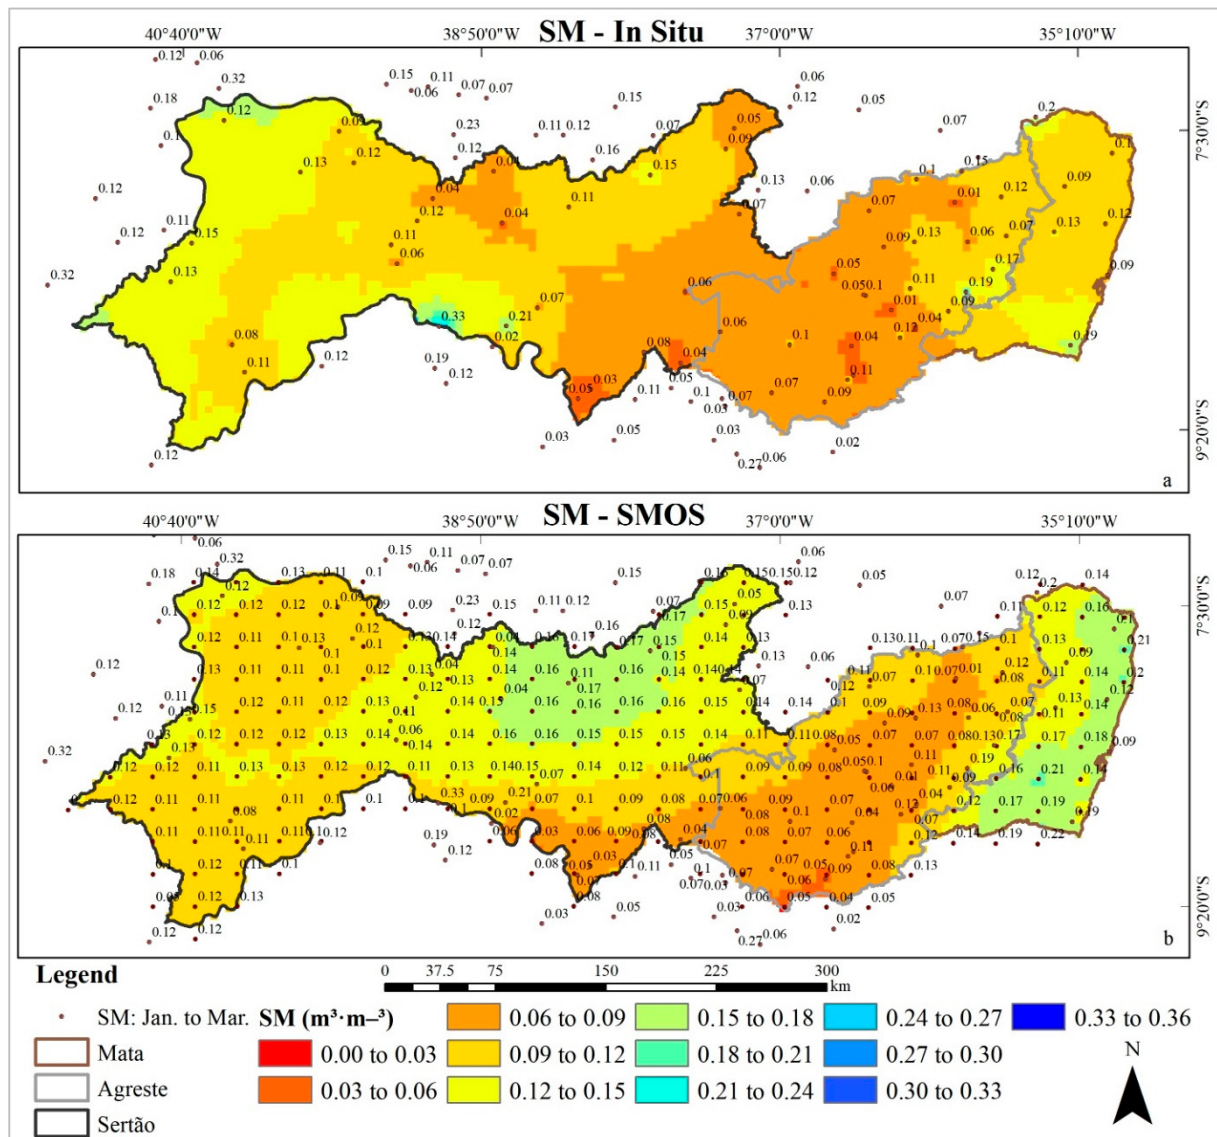

**Figure S1.** Soil moisture spatial distribution with in situ and SMOS data for the January–February–March (JFM) season. The numbers indicate the soil moisture at the samples.

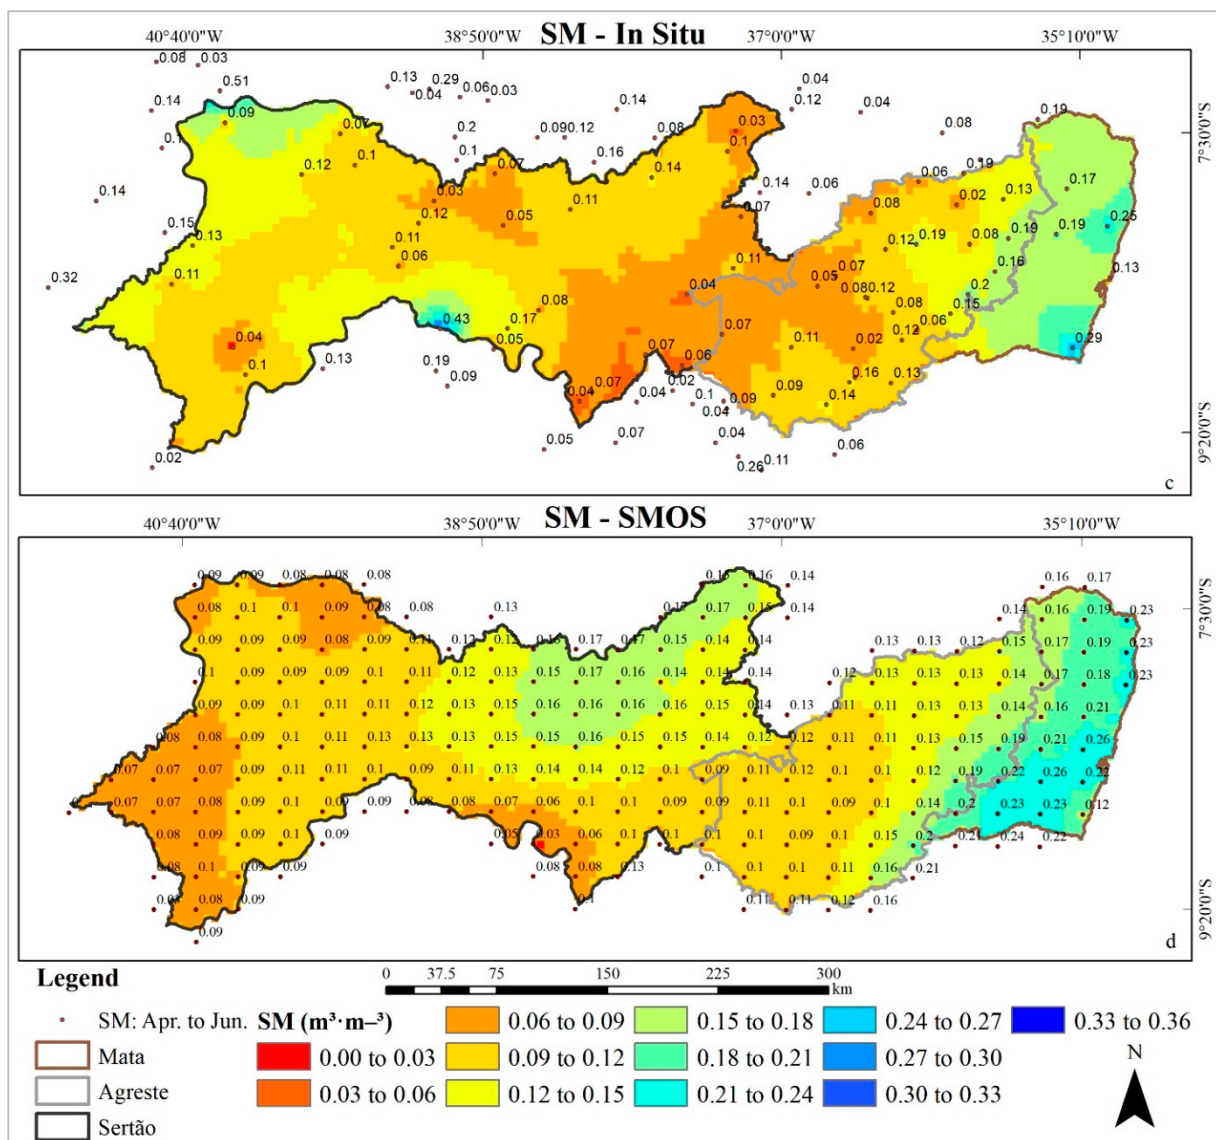

**Figure S2.** Soil moisture spatial distribution with in situ and SMOS data for the April-May-June (AMJ) season. The numbers indicate the soil moisture at the samples.

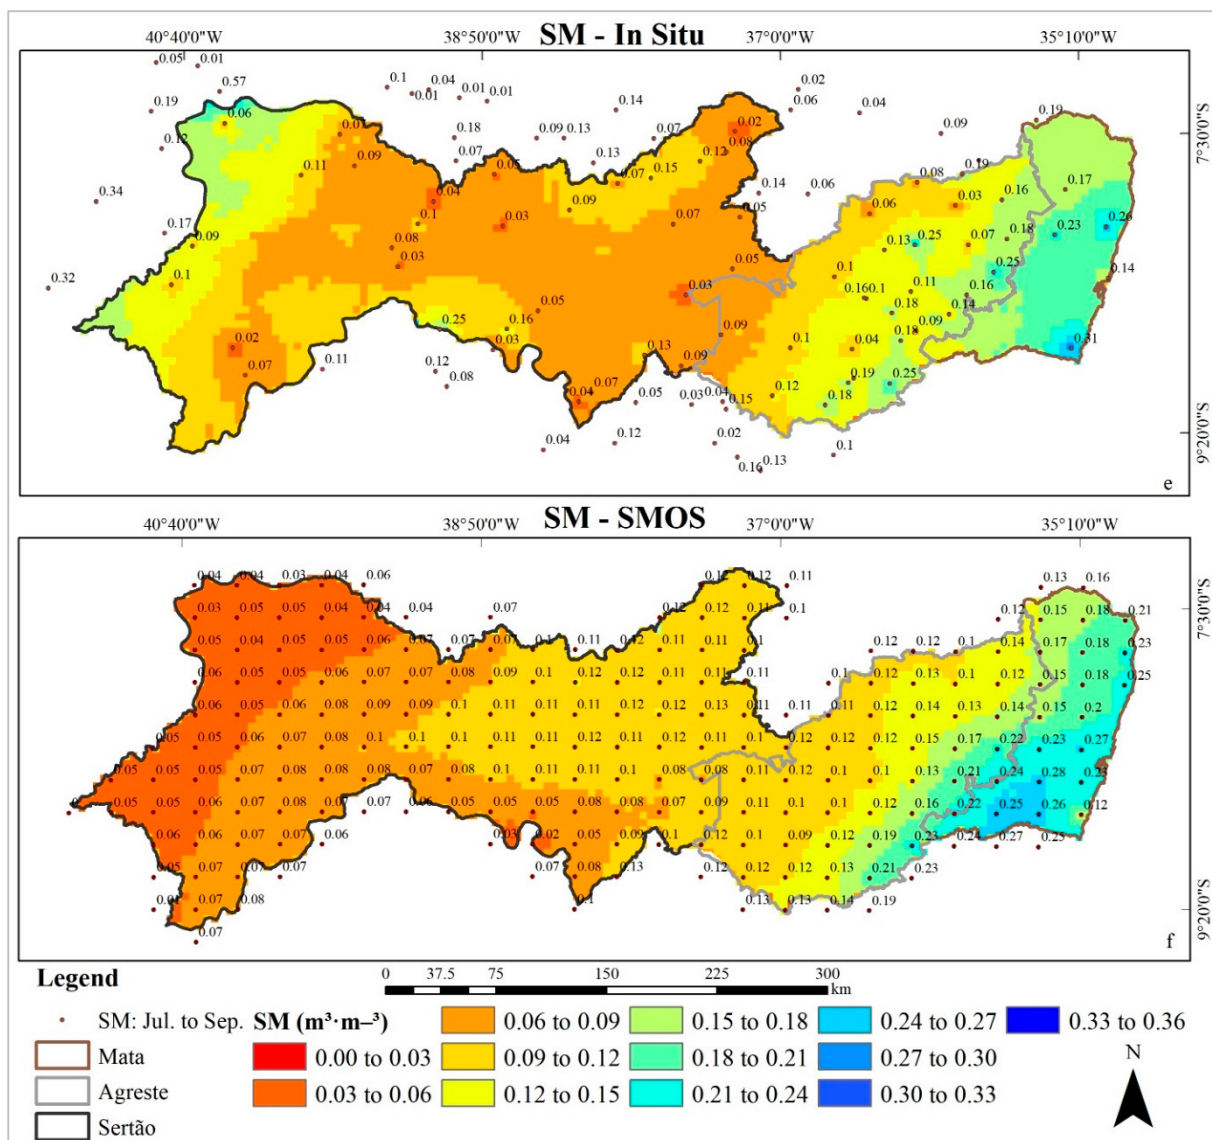

**Figure S3.** Soil moisture spatial distribution with in situ and SMOS data for the July–August–September (JAS) season. The numbers indicate the soil moisture at the samples.

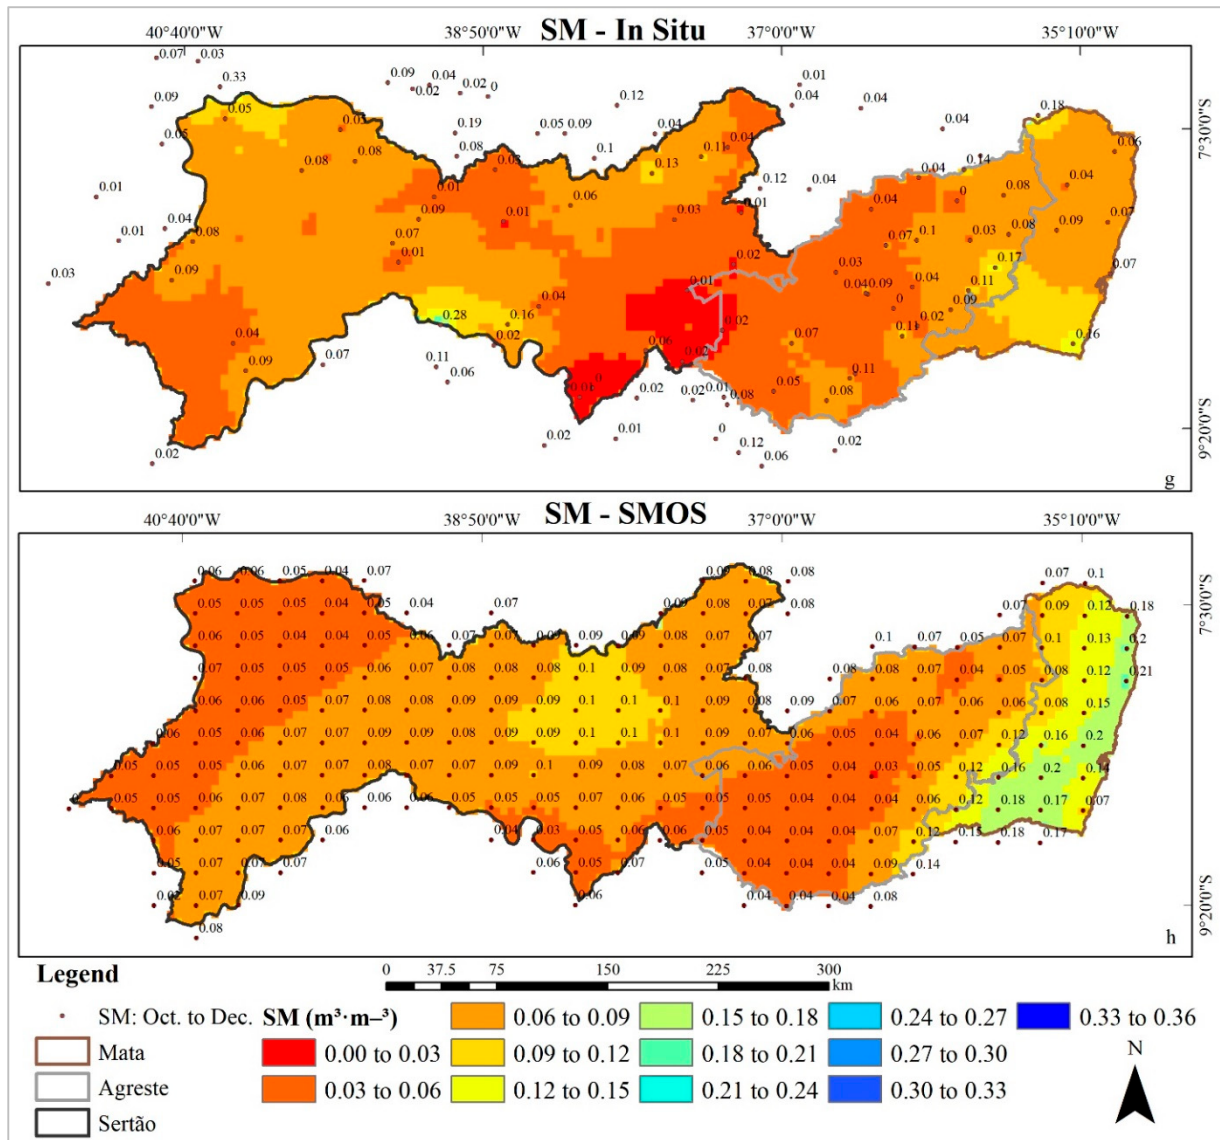

**Figure S4.** Soil moisture spatial distribution with in situ and SMOS data for the October–November–December (OND) season. The numbers indicate the soil moisture at the samples.
